# Supplementary material
Source: HighWire-hosted journal article supplement (https://www.cmajopen.ca/highwire/filestream/81300/field_highwire_adjunct_files/1/2019-0149-2-at.pdf)
Supplement: 2019-0149-2-at.pdf [file 2019-0149-2-at.pdf]

**Appendix 2 (as supplied by the authors): Parenting questions**

The following questions have to do with things that your child does and ways that you, as a parent, react to him/her.

|                                                                                                          | Never                 | About once a week or less | A few times a week    | One or two times a day  | Many times each day   |
|----------------------------------------------------------------------------------------------------------|-----------------------|---------------------------|-----------------------|-------------------------|-----------------------|
| How often do you get annoyed with this child for saying or doing something he/she is not supposed to do? | <input type="radio"/> | <input type="radio"/>     | <input type="radio"/> | <input type="radio"/>   | <input type="radio"/> |
|                                                                                                          | Never                 | Less than half the time   | About half the time   | More than half the time | All the time          |
| Of all the times that you talk to him/her about his/her behaviour, what proportion is praise?            | <input type="radio"/> | <input type="radio"/>     | <input type="radio"/> | <input type="radio"/>   | <input type="radio"/> |
| Of all the times that you talk to him/her about his/her behaviour, what proportion is disapproval?       | <input type="radio"/> | <input type="radio"/>     | <input type="radio"/> | <input type="radio"/>   | <input type="radio"/> |
| How often do you get angry when you punish him/her?                                                      | <input type="radio"/> | <input type="radio"/>     | <input type="radio"/> | <input type="radio"/>   | <input type="radio"/> |
| How often do you think that the kind of punishment you give him/her depends on your mood?                | <input type="radio"/> | <input type="radio"/>     | <input type="radio"/> | <input type="radio"/>   | <input type="radio"/> |
| How often do you feel you are having problems with managing him/her in general?                          | <input type="radio"/> | <input type="radio"/>     | <input type="radio"/> | <input type="radio"/>   | <input type="radio"/> |
| How often do you have to discipline him/her repeatedly for the same thing?                               | <input type="radio"/> | <input type="radio"/>     | <input type="radio"/> | <input type="radio"/>   | <input type="radio"/> |
